# Supplementary material for: Enhancing Analytical Thinking in Early-Career Physicians: Evaluating the EBM-CBL-PBL Integrated Teaching Model
Source: Research Square preprint supplement (doi:10.21203/rs.3.rs-6439748/v1), 2025-05-09
Supplement: Supplementary file 2 [file da596c00dd73f3a074914850.docx]

**Cognitive Reflection Test (CRT) Questionnaire**

**Participant Information**

**1. Participant Category** (Please check the appropriate option):

☐ A. Trainee
☐ B. Resident Physician
☐ C. Attending Physician
☐ D. Consultant-level Physician or above

**2. Age**: ______ years

**3. Gender**:
☐ Male
☐ Female

**CRT Test Questions**
Please read the following questions and write your answers.

**Question 1**:
A bat and a ball cost $1.10 in total. The bat costs $1.00 more than the ball.

Question: What is the price of the ball?
Your answer: ______________

**Question 2**:
If it takes 5 machines 5 minutes to make 5 widgets.

Question: how long would it take 100 machines to make 100 widgets?
Your answer: ______________

**Question 3**:
In a lake, there is a patch of lily pads. Every day, the patch doubles in size. If it takes 48 days for the patch to cover the entire lake,

Question: how long would it take for the patch to cover half of the lake?
Your answer: ______________

**Instructions**

- Complete the questionnaire independently
- Provide your first intuitive response to each question - no overthinking required
- All responses will be anonymized for research purposes and will not affect your training or work

**Thank you for your participation!**

### ****Student Teaching Satisfaction Survey****

**Participant Information**

**1. Age**: ______ years

**2. Gender**:
☐ Male
☐ Female

#### ****Survey Content****

**1. Satisfaction with Teaching Methods (Total score: 100)**
Please evaluate the current teaching approach:

☐ Very Satisfied (20 points)

☐ Satisfied (16 points)

☐ Neutral (12 points)

☐ Dissatisfied (8 points)

☐ Very Dissatisfied (4 points)

**2. Depth of Content Comprehension**
How well do you understand the course material?

☐ Very Easy to Understand (20 points)

☐ Relatively Easy (16 points)

☐ Neutral (12 points)

☐ Somewhat Difficult (8 points)

☐ Very Difficult (4 points)

**3. Learning Motivation and Interest Level**
Does the teaching stimulate your learning interest?

☐ Highly Motivated - Active Learner (20 points)

☐ Moderately Interested - Willing to Learn (16 points)

☐ Neutral - Passive Learner (12 points)

☐ Limited Interest - Rarely Active (8 points)

☐ No Interest - Never Active (4 points)

**4. Teacher-Student Interaction and Classroom Atmosphere**
(1) How often do you interact with instructors (asking questions/expressing opinions)?

☐ Frequently (10 points)

☐ Occasionally (8 points)

☐ Rarely (4 points)

☐ Never (2 points)

(2) How would you describe the classroom atmosphere?

☐ Very Lively (10 points)

☐ Moderately Active (8 points)

☐ Neutral (6 points)

☐ Somewhat Dull (4 points)

☐ Very Dull (2 points)

**5. Future Teaching Method Improvements**
(1) Would you like to continue with the current teaching methods?

☐ Strongly Desire (2 points)

☐ Moderately Desire (4 points)

☐ Neutral (6 points)

☐ Slightly Oppose (8 points)

☐ Strongly Oppose (10 points)
